# Supplementary material for: Phase behavior of AB/CD diblock copolymer blends via coarse-grained simulation
Source: Royal Society of Chemistry journal article supplement (doi:10.1039/d0sm00096e), 2020-01-01
Supplement: d0sm00096e2.pdf [file d0sm00096e2.pdf]

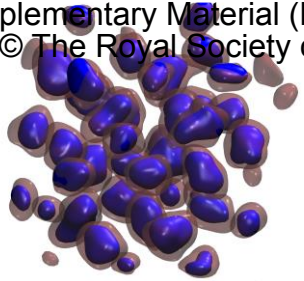

A1B1C1D18

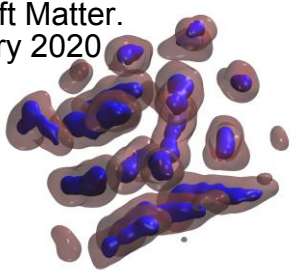

A1B2C2D17

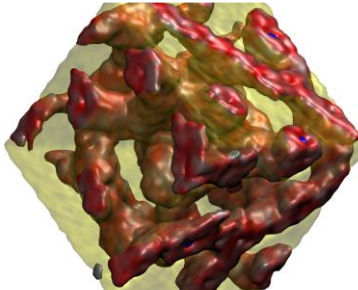

A1B3C3D16

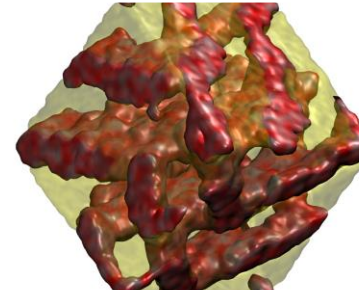

A1B4C4D15

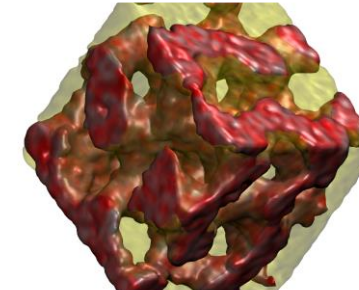

A1B5C5D14

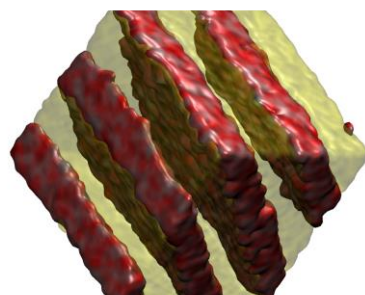

A1B6C6D13

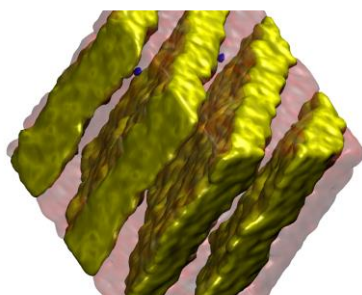

A1B7C7D12

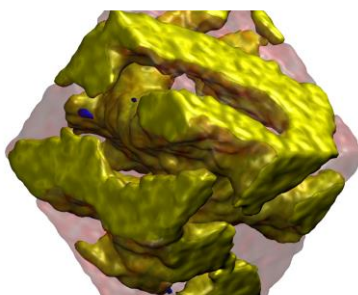

A1B8C8D11

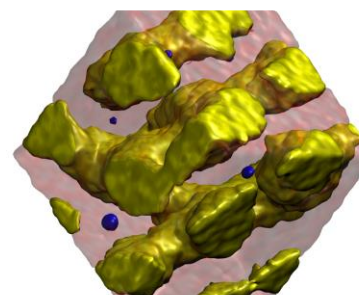

A1B9C9D10

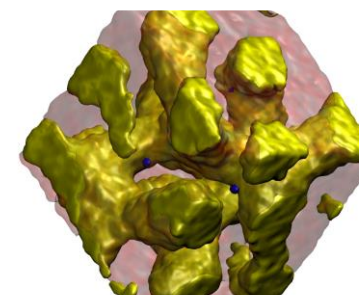

A1B10C10D9

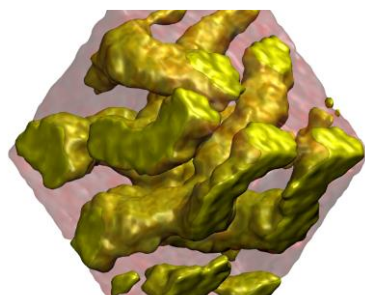

A1B11C11D8

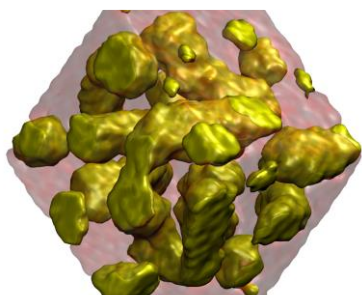

A1B12C12D7

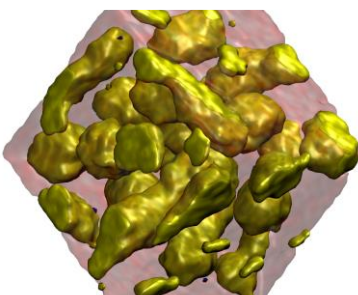

A1B13C13D6

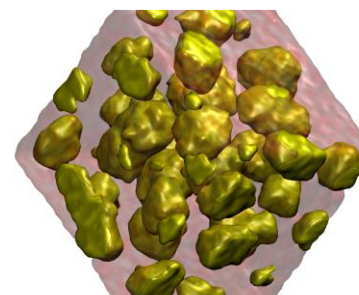

A1B14C14D5

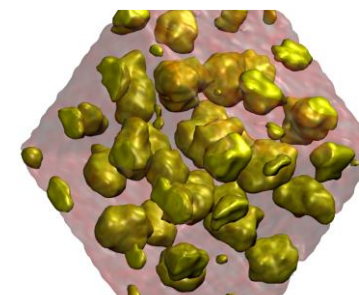

A1B15C15D4

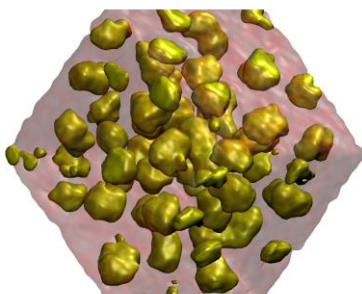

A1B16C16D3

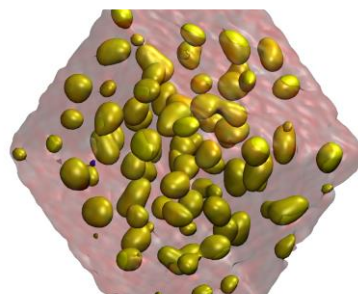

A1B17C17D2

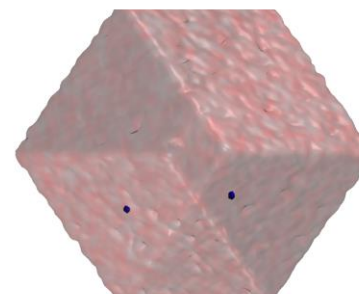

A1B18C18D1

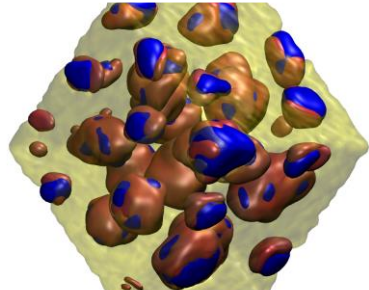

A2B1C1D17

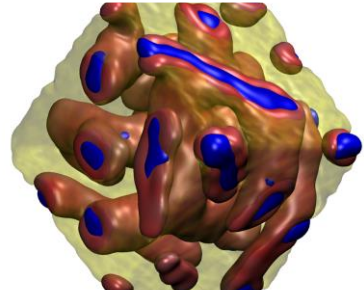

A2B2C2D16

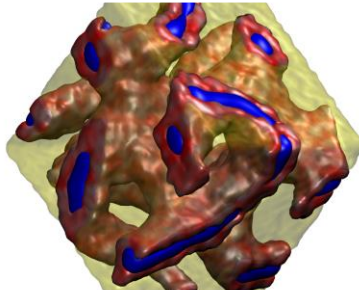

A2B3C3D15

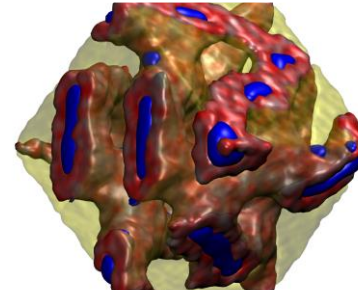

A2B4C4D14

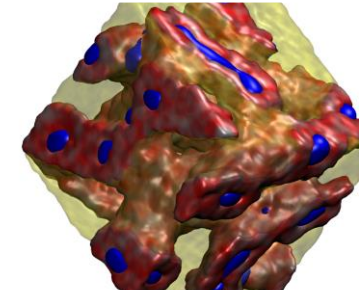

A2B5C5D13

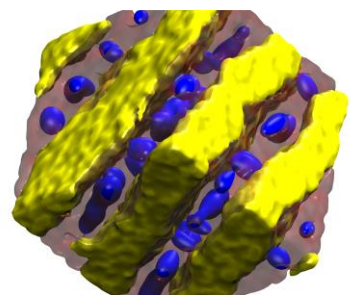

A2B6C6D12

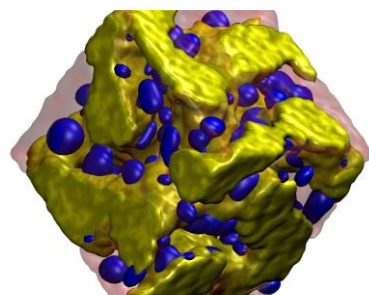

A2B7C7D11

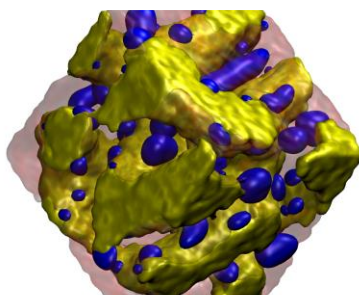

A2B8C8D10

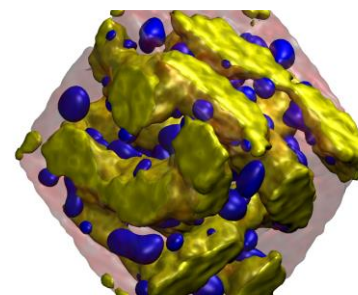

A2B9C9D9

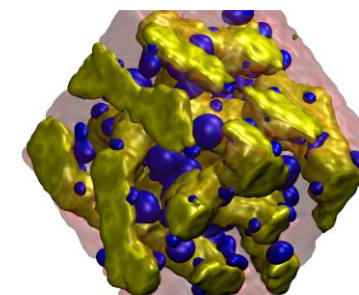

A2B10C10D8

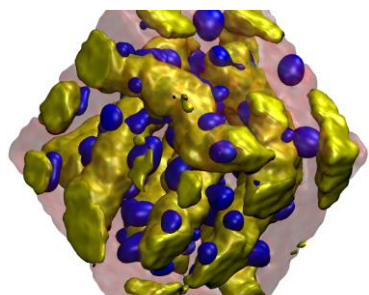

A2B11C11D7

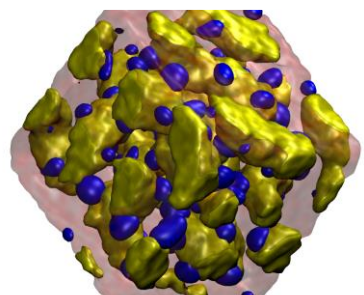

A2B12C12D6

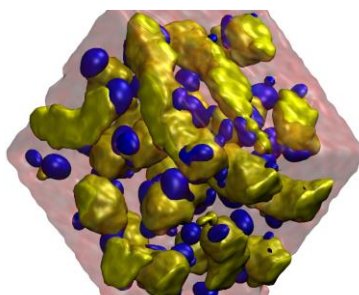

A2B13C13D5

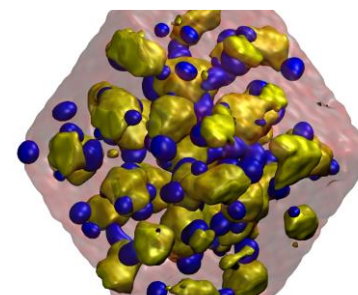

A2B14C14D4

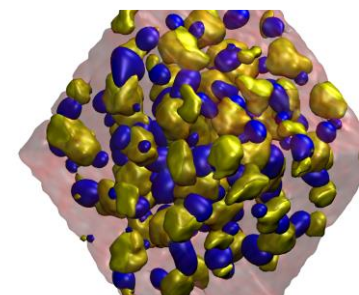

A2B15C15D3

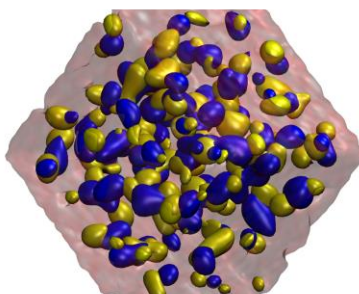

A2B16C16D2



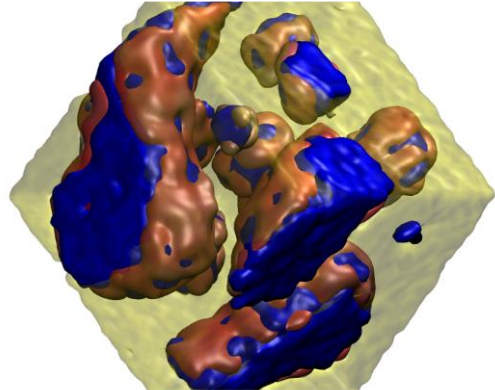

A4B1C1D15

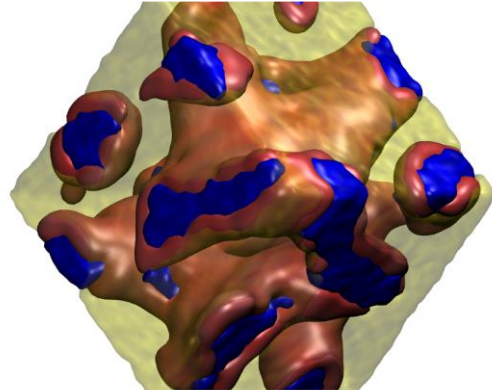

A4B2C2D14

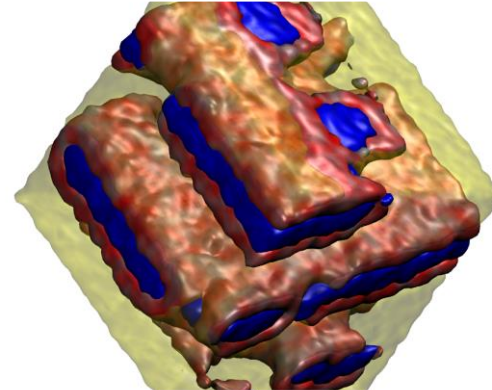

A4B3C3D13

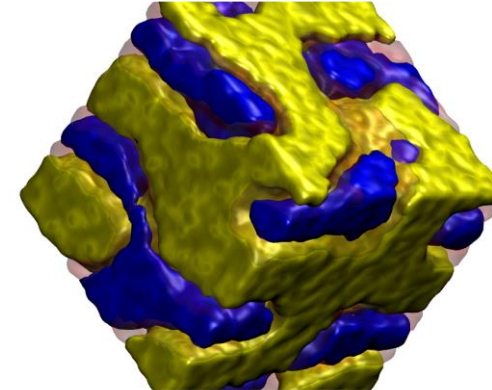

A4B4C4D12

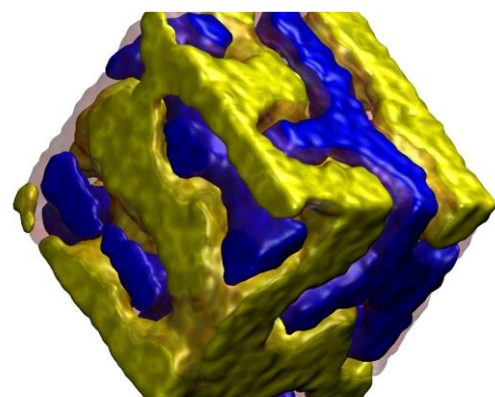

A4B5C5D12

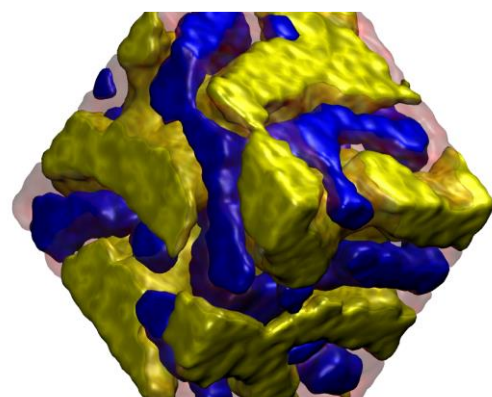

A4B6C6D10

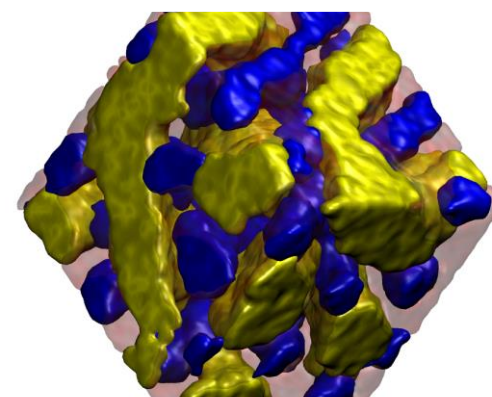

A4B7C7D9

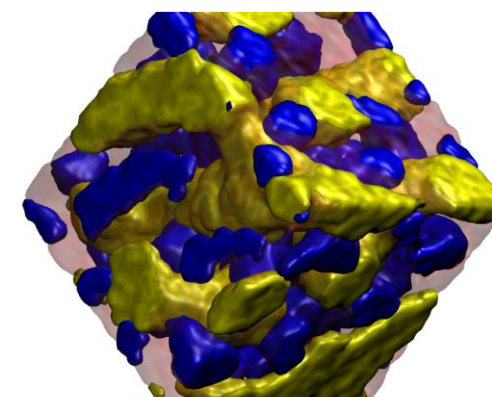

A4B8C8D8

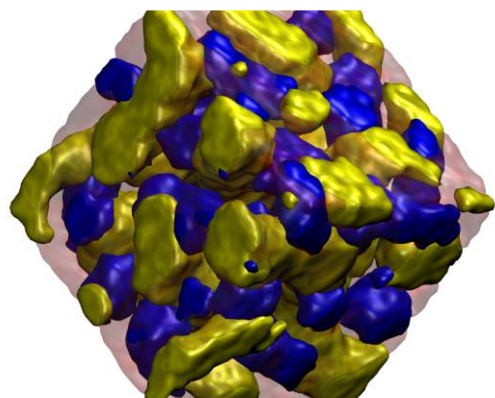

A4B9C9D7

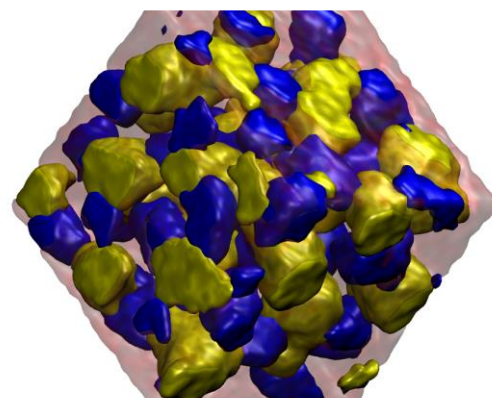

A4B10C10D6

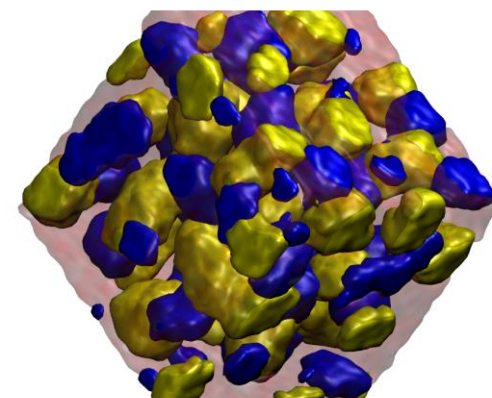

A4B11C11D5

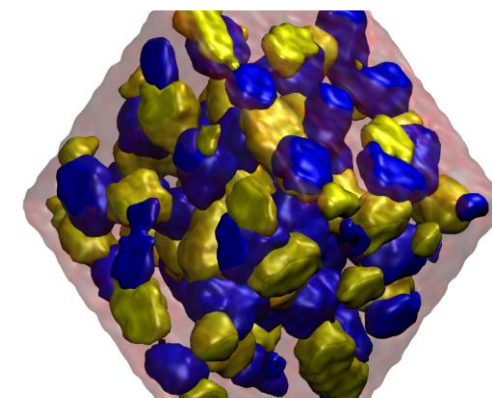

A4B12C12D4

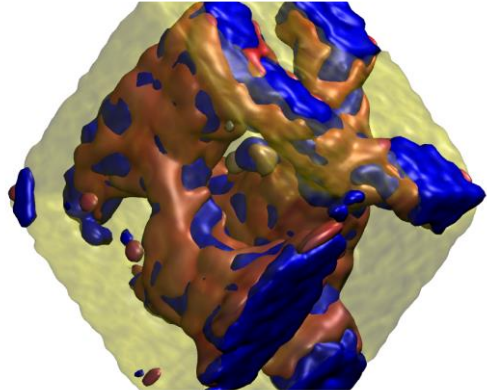

A5B1C1D14

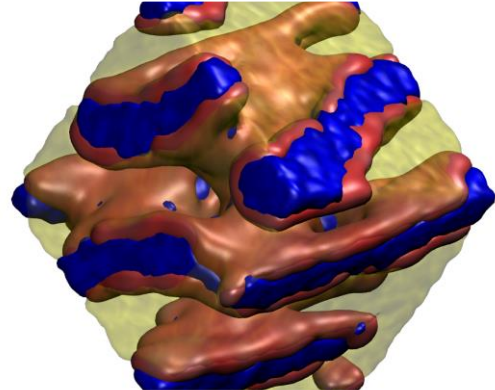

A5B2C2D13

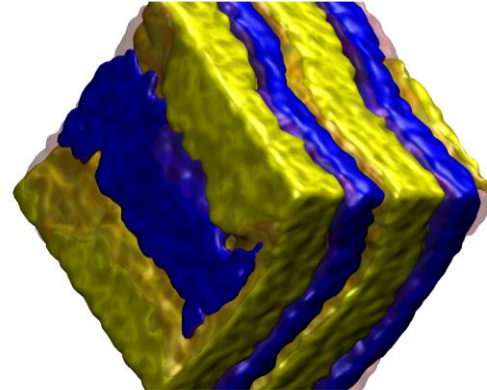

A5B3C3D12

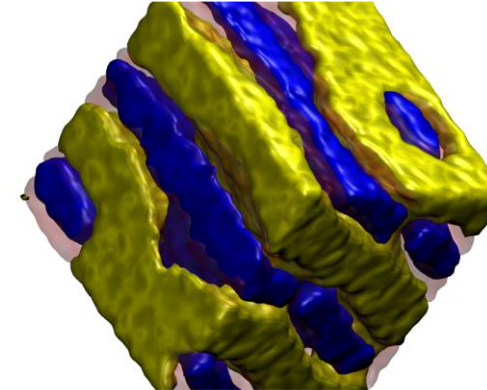

A5B4C4D11

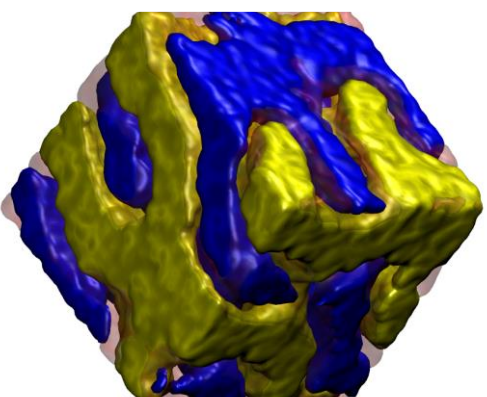

A5B5C5D10

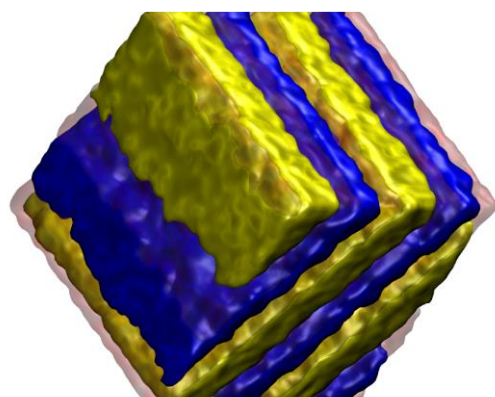

A5B6C6D9

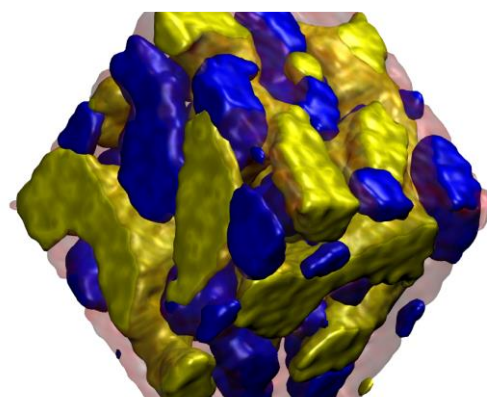

A5B7C7D8

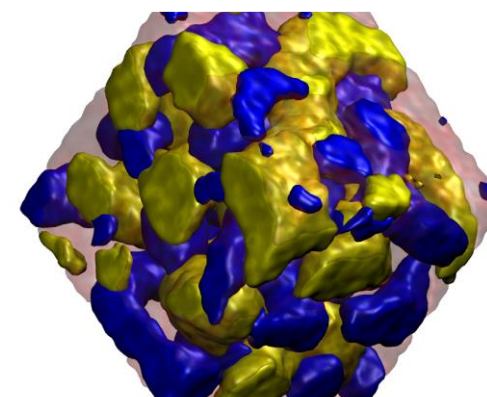

A5B8C8D7

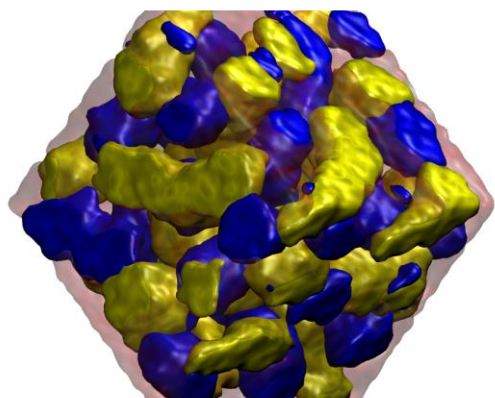

A5B9C9D6

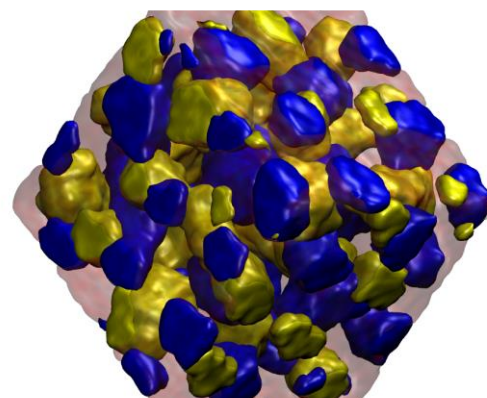

A5B10C10D5

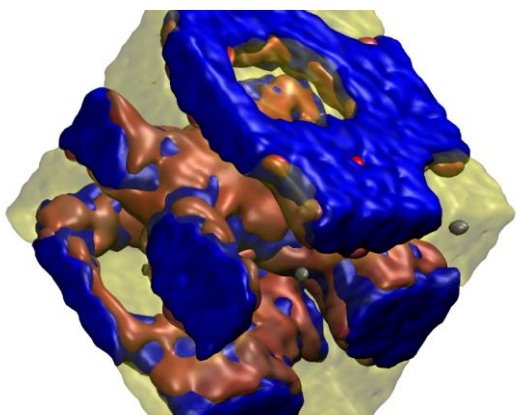

A6B1C1D13

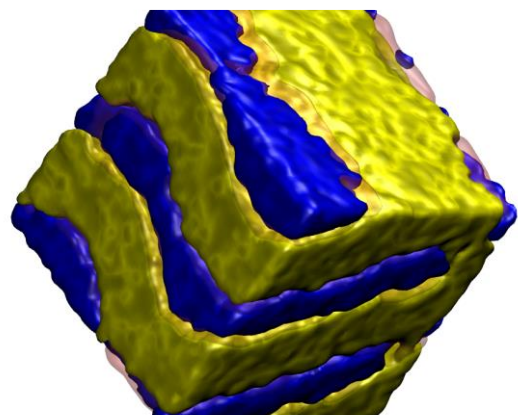

A6B2C2D12

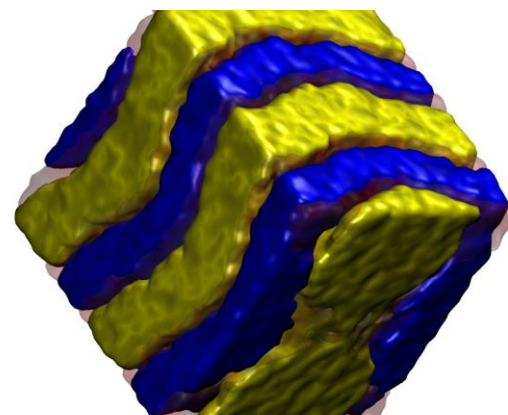

A6B3C3D11

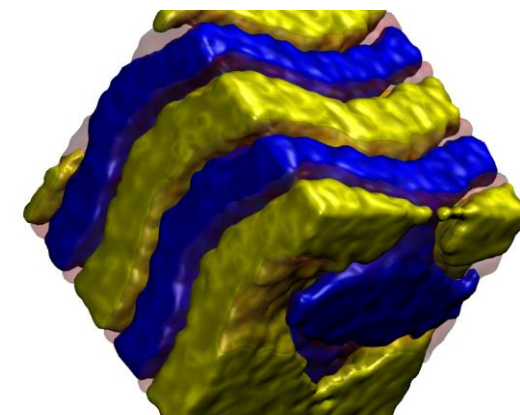

A6B4C4D10

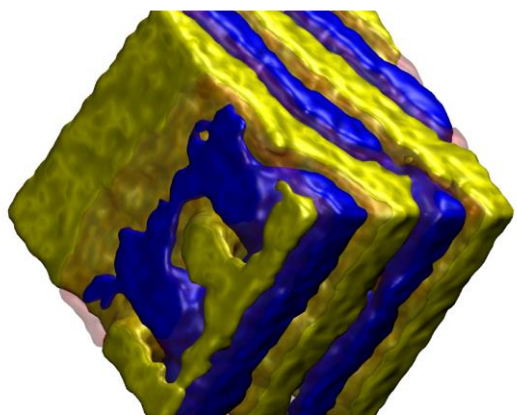

A6B5C5D9

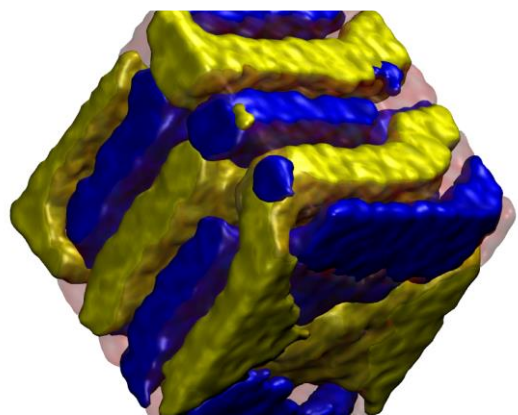

A6B6C6D8

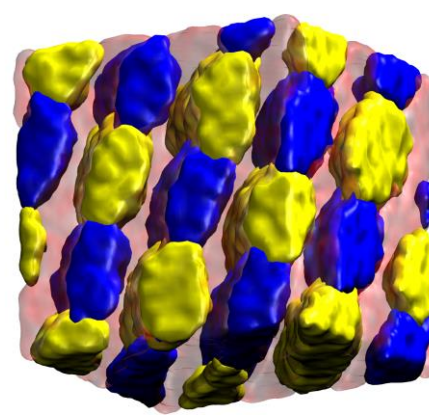

A6B7C7D7

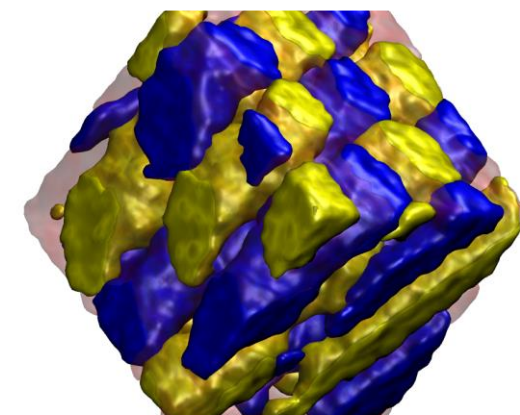

A6B8C8D6

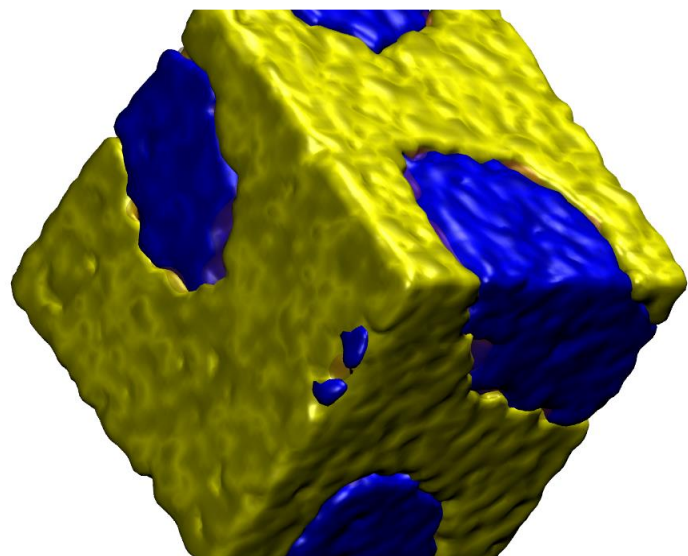

A7B1C1D12

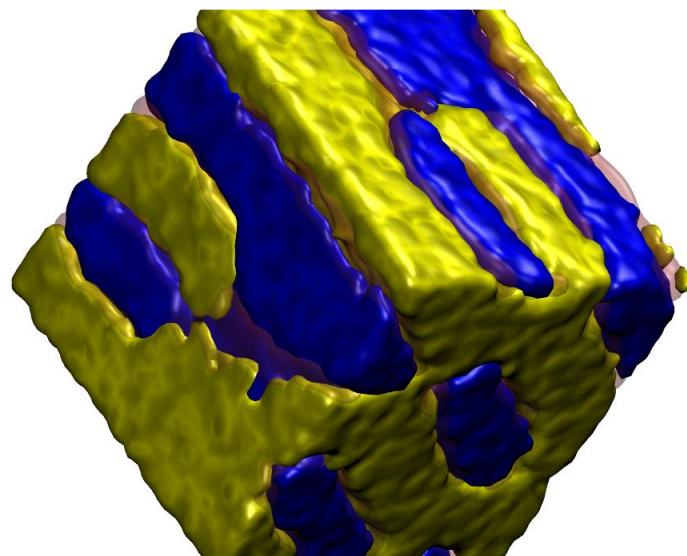

A7B2C2D11

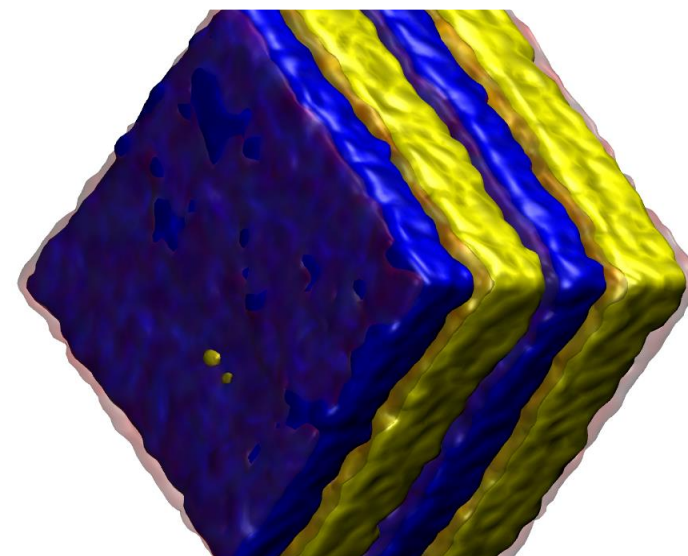

A7B3C3D10

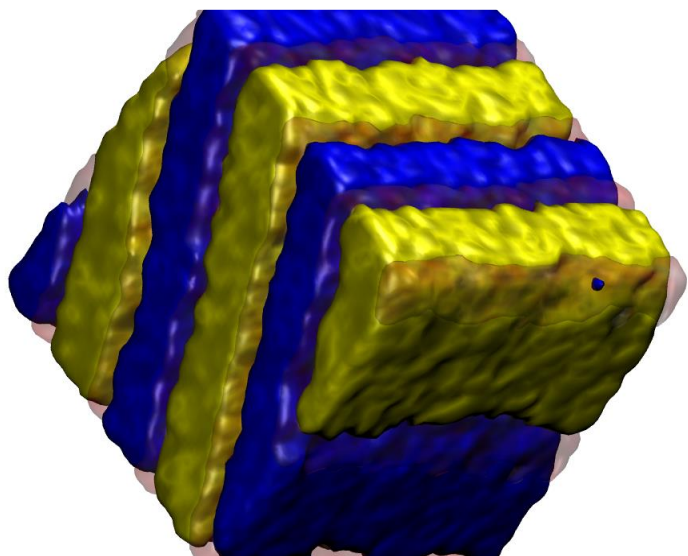

A7B4C4D9

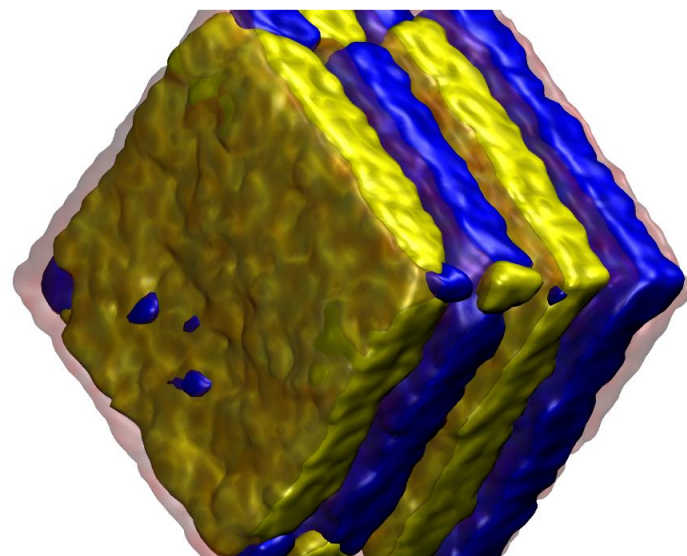

A7B5C5D8

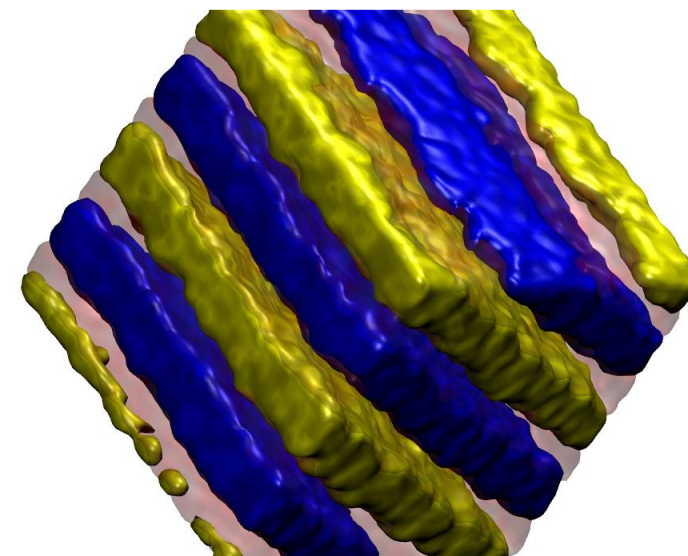

A7B6C6D7

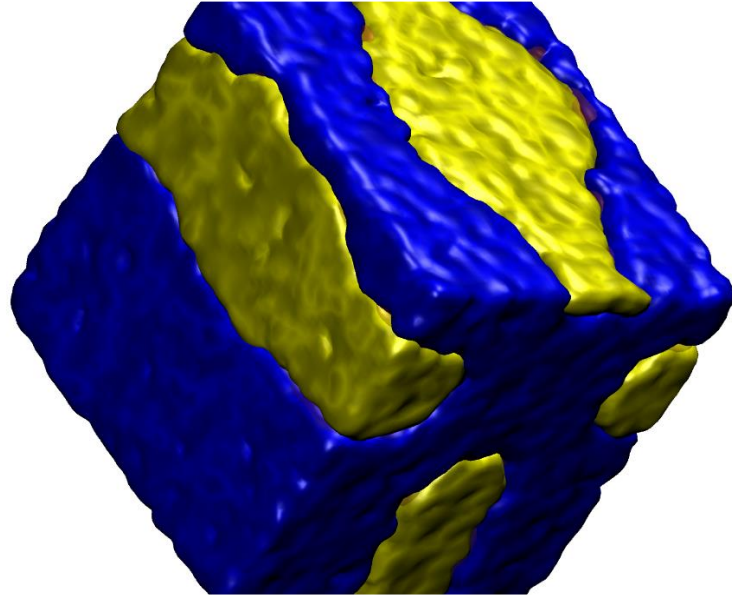

A8B1C1D11

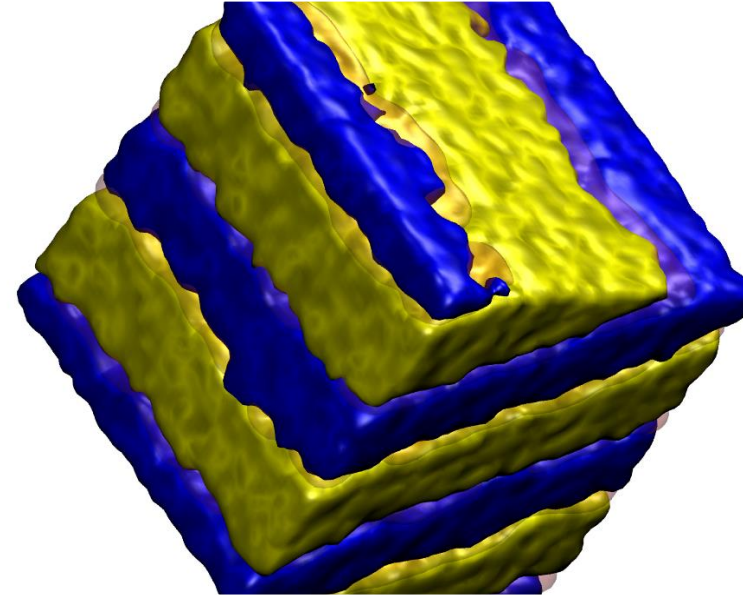

A8B2C2D10

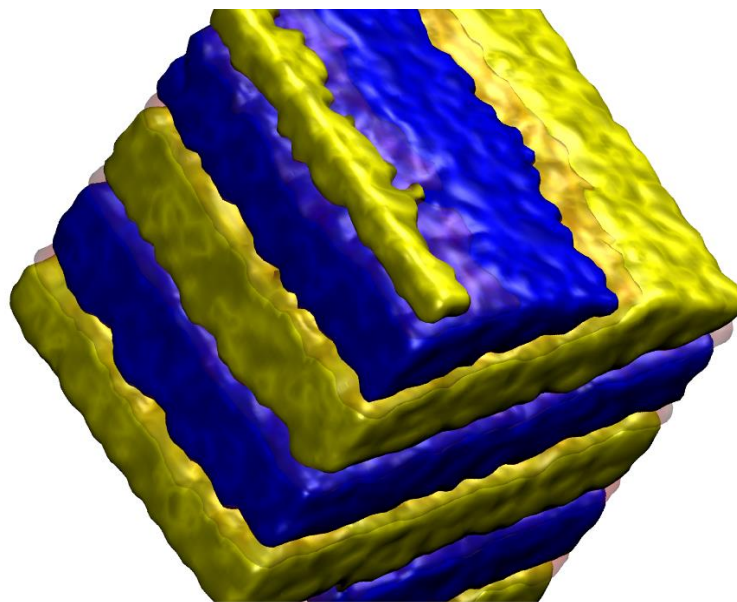

A8B3C3D9

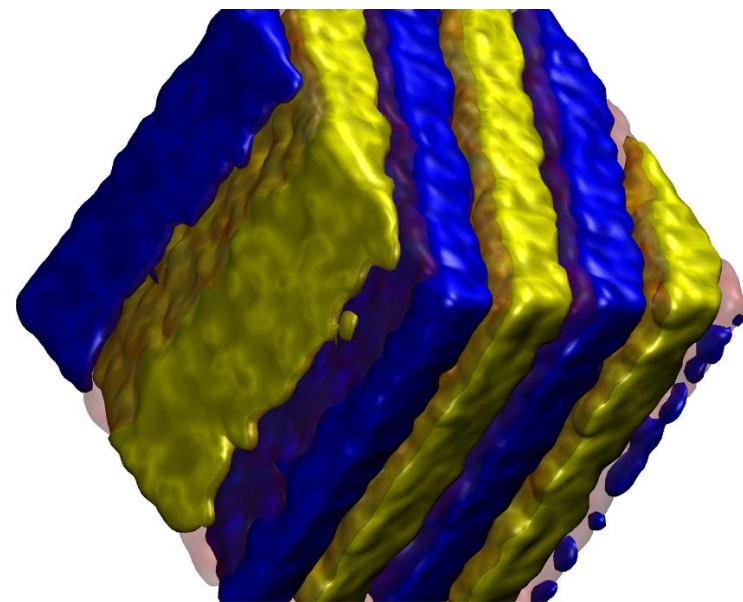

A8B4C4D8



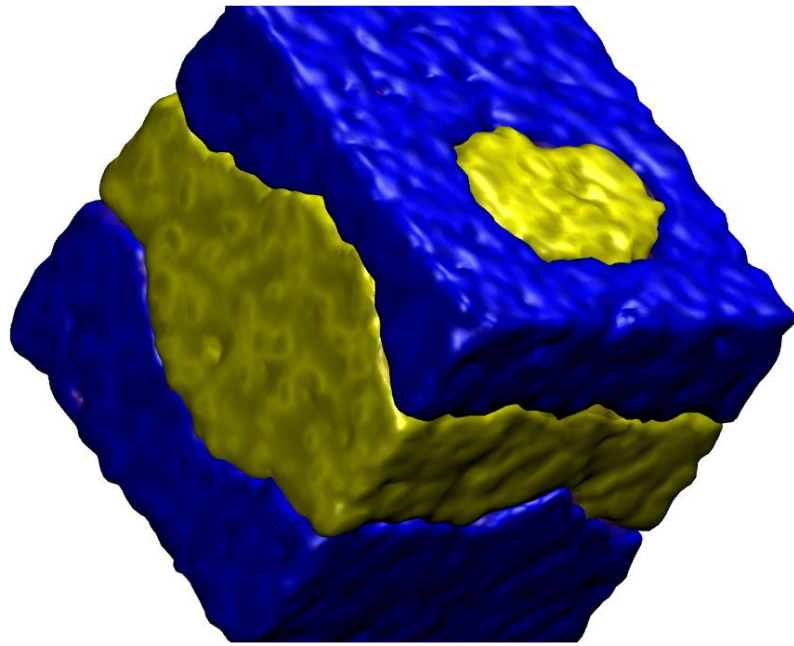

A9B1C1D10

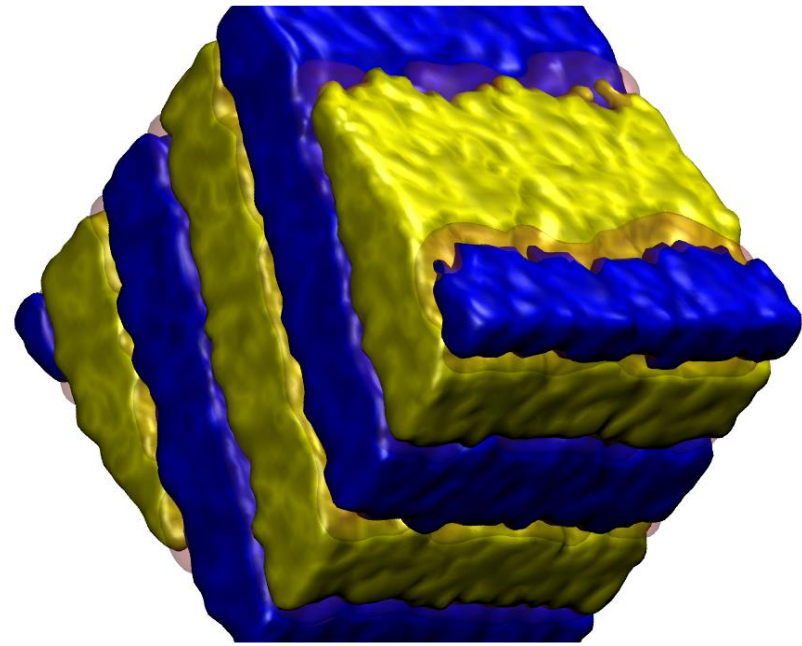

A9B2C2D9
